# Supplementary material for: Disturbed nitric oxide signalling gives rise to congenital bicuspid aortic valve and aortopathy
Source: Oxford University Press journal article supplement (doi:10.1242/dmm.044990), 2020-08-14
Supplement: dmm044990supp.pdf [file dmm044990supp.pdf]

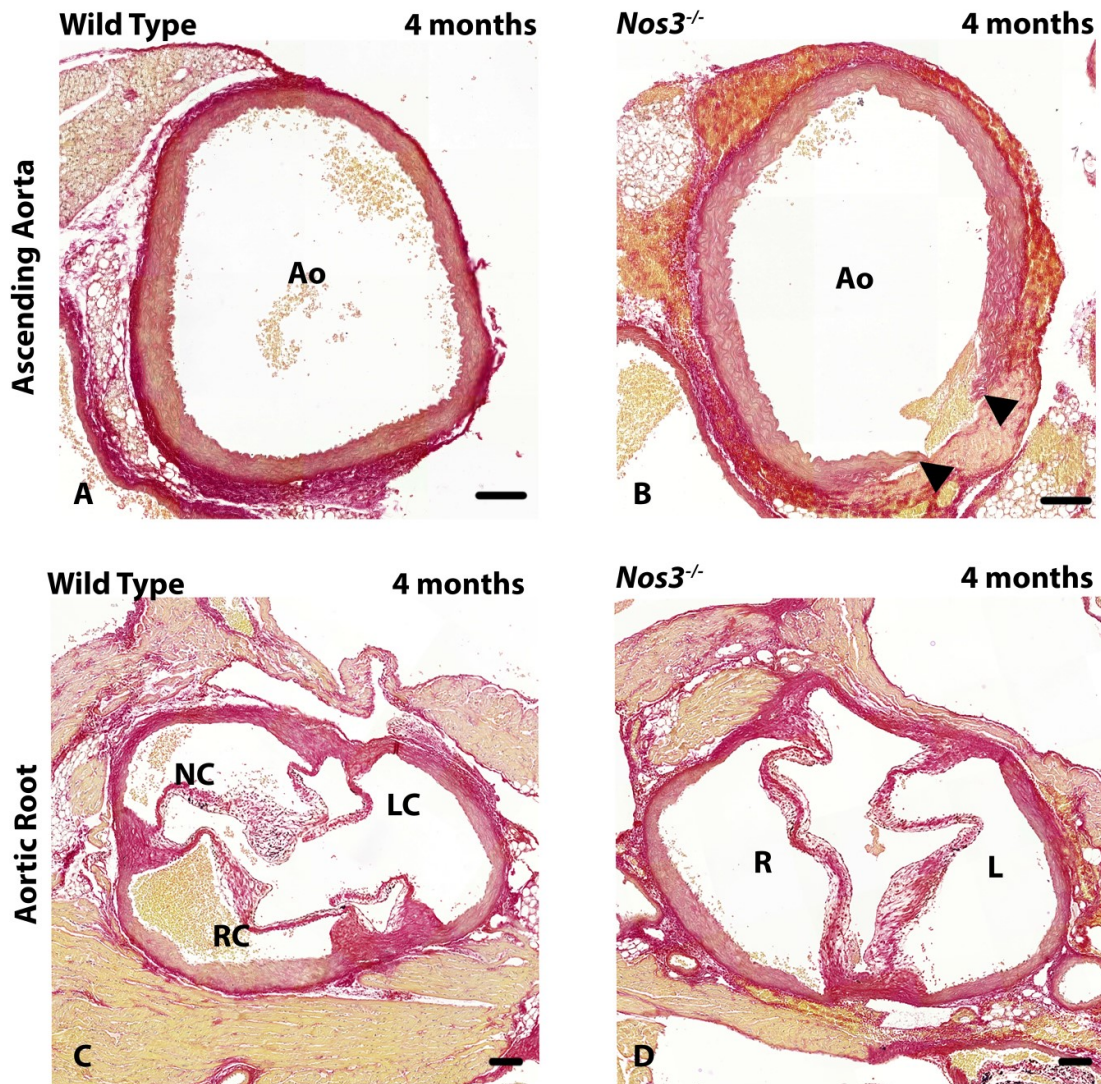

**Fig. S1. Aortic dissection in *Nos3*<sup>-/-</sup> mice is associated with BAV.**

Additional histological staining of wild type and *Nos3*<sup>-/-</sup> mice presented in figure 1 stained with a combination of collagen (red) and elastin (pink) showing the ascending aorta (A-B) and aortic root (C-D). This case of aortic dissection developed in conjunction with a bicuspid aortic valve (D). Aortic dissection is apparent in the aortic vessel wall of the *Nos3*<sup>-/-</sup> mouse (arrow heads). Ao: Aorta, NC: Non-coronary leaflet, RC: Right coronary leaflet, LC: Left coronary leaflet, R: Right leaflet, L: Left leaflet, Scale bar: 100 μm

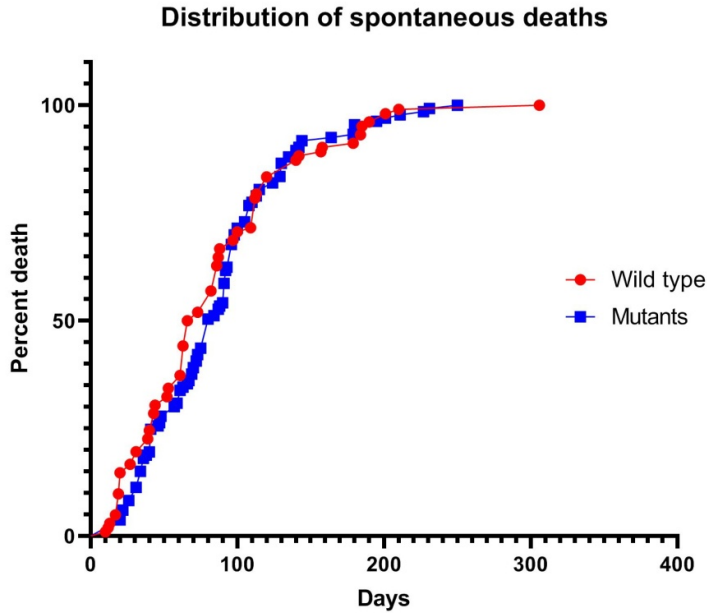

**Fig. S2. Temporal distribution of spontaneous death events.**

Wild type (n=103) and *Nos3<sup>-/-</sup>* (n=133) in which spontaneous death was observed were examined for the chronologic distribution of death events. No significant ( $P > 0.05$ ) difference was observed between wild type and mutant populations using Mantel-Cox comparison of survival curves.

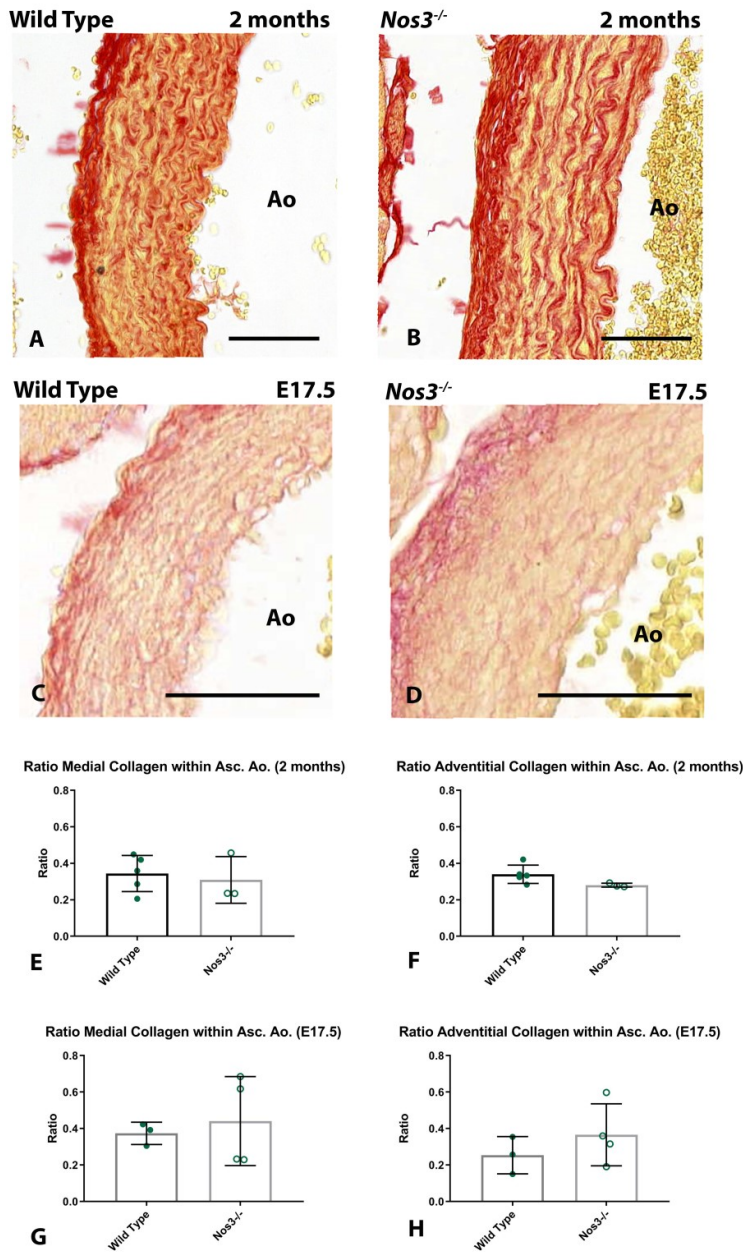

**Fig. S3. Collagen deposition is not affected in the ascending aortic wall of *Nos3<sup>-/-</sup>* mice.** A-B: Transverse sections of the aortic wall of adult (A) wild type and (B) *Nos3<sup>-/-</sup>* mice stained with Sirius red to show collagen deposition in the media and adventitia of the ascending aorta. C-D: Sirius red staining of the embryonic aortic wall of (C) wild type and (D) *Nos3<sup>-/-</sup>* mice at stage E17.5. E-H: Volumetric quantification of collagen staining within the medial (E,G) as well as adventitial layers (F,H) of the adult and embryonic ascending aortic wall show no difference ( $P > 0.05$ ) in the deposition of collagen between wild type and *Nos3<sup>-/-</sup>* mice. Ao: Aorta. Data are mean  $\pm$  s.d. for  $n \geq 3$  mice per group. Scale bar: 50  $\mu$ m

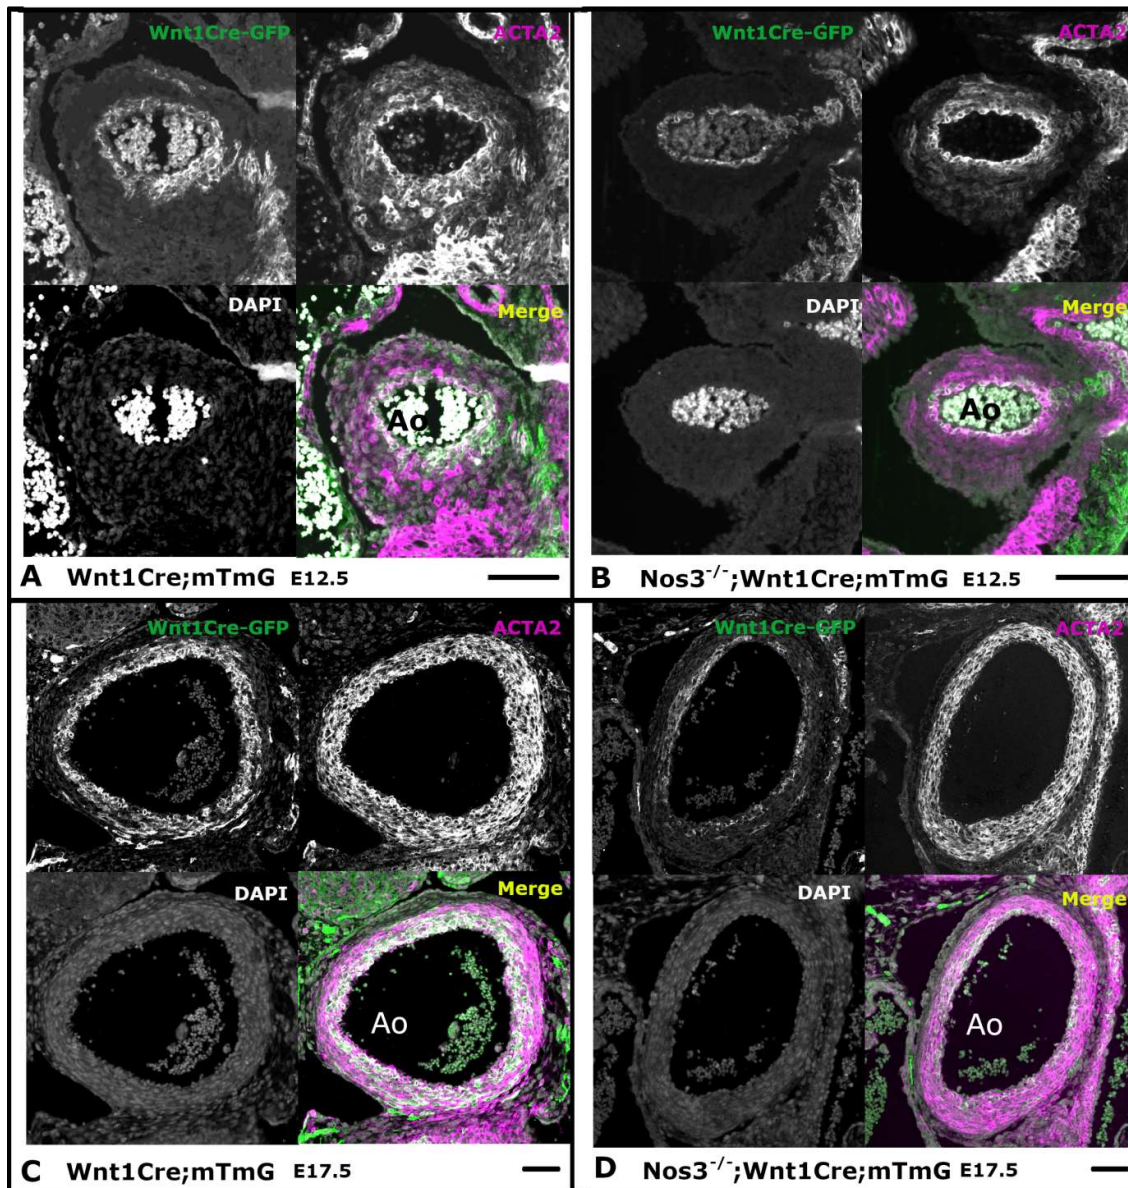

**Fig. S4. Neural crest derived smooth muscle cells populate the inner media of the ascending aortic vessel wall.**

A-B: Transversal sections of the ascending aorta of *Wnt1Cre;mTmG* and *Nos3<sup>-/-</sup>;Wnt1Cre;mTmG* embryos at E12.5. Neural crest derived vascular smooth muscle cells (VSMCs) express both *Wnt1Cre-GFP* (green) and *ACTA2* (magenta). C-D: Fluorescent images similar to A and B, but showing embryos of developmental age E17.5. Note that expression of *ACTA2* is more pronounced in neural crest derived VSMCs than VSMCs of different origin at E12.5 in both wild type and *Nos3<sup>-/-</sup>* embryos. Nuclear staining: DAPI (grey). Scale bars: 50µm. Ao: Aorta.

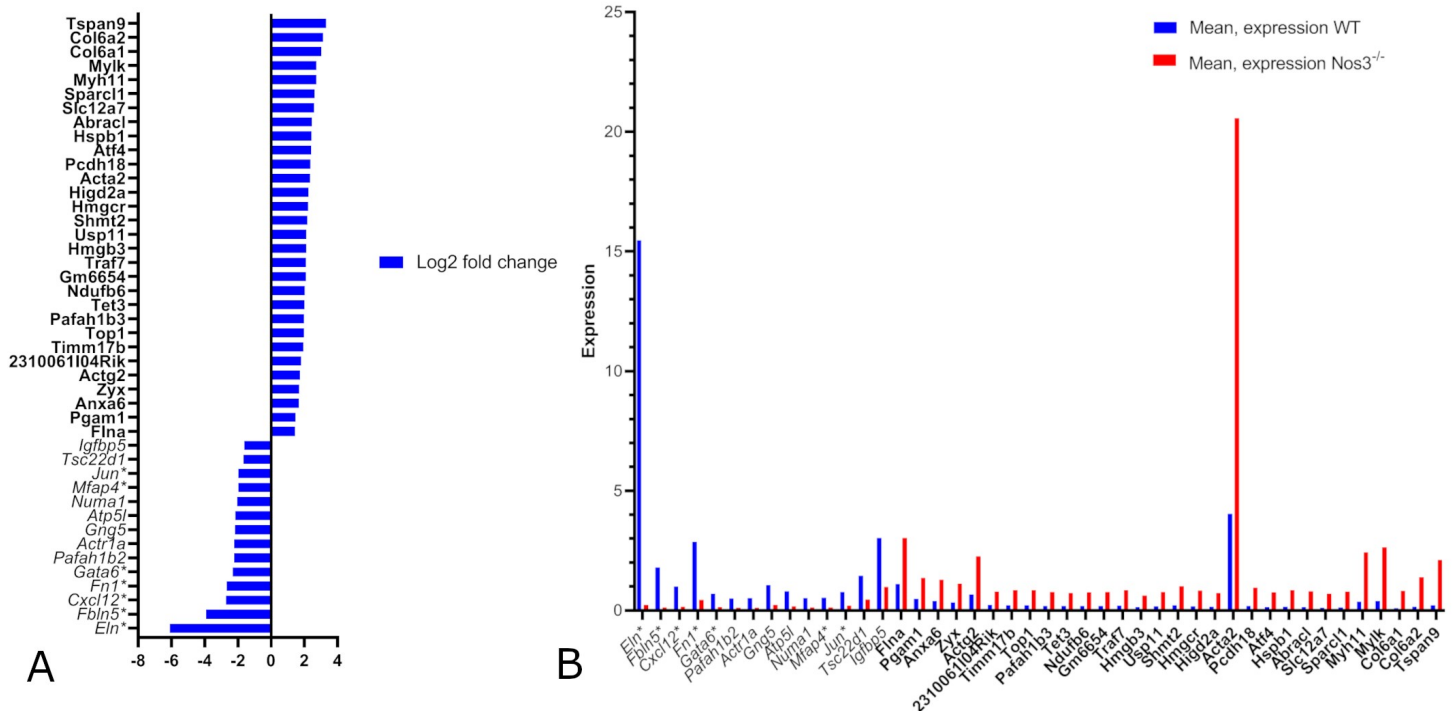

**Fig. S5. Differential gene expression profiles among VSMC clusters.**

A-B: The differential expression profile of VSMCs affected by the *Nos3* mutation. Asterix indicates downregulated genes associated with aneurysm formation. Bold gene names correspond to upregulated genes.

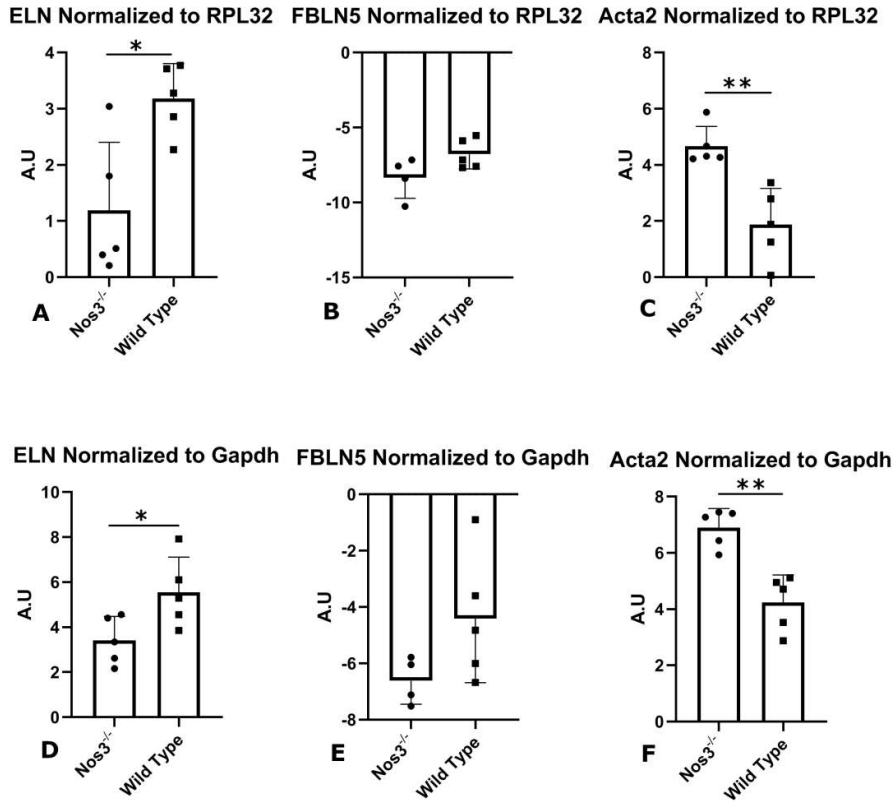

**Fig. S6. Extended qPCR evaluation normalized to Rpl32 and Gapdh.**

A-F: qPCR expression results of 6 month old wild type (N=5) and *Nos3<sup>-/-</sup>* (N=5) mice using *Rpl32* as well as *Gapdh* as reference genes. Statistical analysis were performed using a two-tailed student T-test, \* and \*\* indicate P<0.05 and P<0.01 respectively. A.U: Arbitrary Units. Data are mean ± sd.

|           |                                   |
|-----------|-----------------------------------|
| ELN_FWD   | CCC ACC TCT TTG TGT TTC GC        |
| ELN_REV   | CCC AAA GAG CAC ACC AAC AAT       |
| FBLN5_FWD | GTG CTT GGG GTT GGT TTT GA        |
| FBLN5_REV | TCA GTT CCC CAT CTT TTG CCA       |
| ACTA2_FWD | GCT ACG AAC TGC CTG ACG G         |
| ACTA2_REV | TAG GTG GTT TCG TGG ATG CC        |
| RPL32_FWD | CAC CAC TCA GAC CGA TAT GTG AAA A |
| RPL32_REV | TGT TGT CAA TGC CTC TGG GTT T     |
| GAPDH_FWD | TTG ATG GCA ACA ATC TCC AC        |
| GAPDH_REV | CGT CCC GTA GAC AAA ATG GT        |

**Table S1. Primers used for qPCR**
